# Supplementary material for: Vitamin E Ameliorates Impaired Ovarian Development, Oxidative Stress, and Disrupted Lipid Metabolism in Oreochromis niloticus Fed with a Diet Containing Olive Oil Instead of Fish Oil
Source: MDPI journal article supplement (doi:10.3390/antiox12081524), 2023-07-29
Supplement: s1 [file s1]

Table S1 Primer sequences used for qRT-PCR

| Primer           | Primer sequence (5'-3')  | NCBI GenBank accession no |
|------------------|--------------------------|---------------------------|
| <i>era</i> -F    | AGCGACAAATCAGTGCACCA     | NM_001279770.1            |
| <i>era</i> -R    | ATTGCACGCTTCCTTCCATC     |                           |
| <i>erβ</i> -F    | AGCATCCAAGGACACAACGA     | NM_001279774.1            |
| <i>erβ</i> -R    | ATGCCCTTTGGTTTCAGCTGT    |                           |
| <i>fshr</i> -F   | ACGCCTGCATCATCATGACA     | NM_001279588.1            |
| <i>fshr</i> -R   | GCTGATGAAGGCTTGCGAAA     |                           |
| <i>lhr</i> -F    | ACAAGCTGACAGTACCTCGC     | XM_005474002.4            |
| <i>lhr</i> -R    | CTGACAGCTCCCCACCAAAA     |                           |
| <i>ppara</i> -F  | TCCAAAAGAAGAACCGAAACA    | NM_001290066.1            |
| <i>ppara</i> -R  | TTCCACCTCTTTCTCAACCAT    |                           |
| <i>pparγ</i> -F  | TTTACCCATCAAACCTGACCAC   | NM_001290200.1            |
| <i>pparγ</i> -R  | GAGGAAATGGAGGCGTAGT      |                           |
| <i>hsl</i> -F    | CGAAAGTTTTGTCCGTGAATA    | FJ601660.1                |
| <i>hsl</i> -R    | CTGATGCCGCTTGTAGTTTTTC   |                           |
| <i>acca</i> -F   | GCGGTGTTTCGGCTTGTTTTT    | XM_025910662.1            |
| <i>acca</i> -R   | CAAGTCCACCTTCCCTTGGT     |                           |
| <i>elovl6</i> -F | ACAGTTCAACGAGGACGAAGC    | XM_003443399.5            |
| <i>elovl6</i> -R | AGCAAGGGTGAGTGACCACAG    |                           |
| <i>nrf2</i> -F   | CTGCCGTAAACGCAAGATGG     | XM_003447296.5            |
| <i>nrf2</i> -R   | ATCCGTTGACTGCTGAAGGG     |                           |
| <i>keap1</i> -F  | CTTCGCCATCATGAACGAGC     | XM_003447926.4            |
| <i>keap1</i> -R  | CACCAACTCCATACCGCACT     |                           |
| <i>nf-κb</i> -F  | GCAGAAGGAGGCAGTGGAAG     | XM_019363515.2            |
| <i>nf-κb</i> -R  | GACCTGCTGTGTTGGTTTGGT    |                           |
| <i>tnfα</i> -F   | GGAAGCAGCTCCACTCTGATGA   | JF957373.1                |
| <i>tnfα</i> -R   | CACAGCGTGTCTCCTTCGTTCA   |                           |
| <i>infγ</i> -F   | AAGAATCGCAGCTCTGCACCAT   | FJ601660.1                |
| <i>infγ</i> -R   | GTGTCGTATTGCTGTGGCTTCC   |                           |
| <i>il1β</i> -F   | CAAGGATGACGACAAGCCAACC   | XM_019365843.2            |
| <i>il1β</i> -R   | AGCGGACAGACATGAGAGTGC    |                           |
| <i>ef1α</i> -F   | ATCAAGAAGATCGGCTACAACCCT | NM_001279647.1            |
| <i>ef1α</i> -R   | ATCCCTTGAACCAGCTCATCTTGT |                           |

*β-actin-F* CCACACAGTGCCCATCTACGA EU887951.1  
*β-actin-R* CCACGCTCTGTCAGGATCTTCA

Table S2 Fatty acid composition in the ovary tissues (% of total fatty acids)

| Fatty acid | 70 OO       | 200 OO      | 70 FO        | 200 FO       | two-way ANOVA |    |             |
|------------|-------------|-------------|--------------|--------------|---------------|----|-------------|
|            |             |             |              |              | Lipid         | Ve | Interaction |
| C12:0      | 0.18±0.04   | 0.15±0.01A  | 0.25±0.05    | 0.21±0.01B   | ns            | ns | ns          |
| C14:0      | 2.66±0.16   | 2.52±0.08   | 3.04±0.11    | 2.62±0.15    | ns            | ns | ns          |
| C15:0      | 0.13±0.02   | 0.15±0.01A  | 0.23±0.03    | 0.20±0.01B   | **            | ns | ns          |
| C16:0      | 28.91±0.64  | 29.64±0.13  | 30.81±0.53   | 30.25±0.33   | *             | ns | ns          |
| C17:0      | 0.22±0.03   | 0.23±0.01A  | 0.35±0.05    | 0.31±0.01B   | **            | ns | ns          |
| C18:0      | 17.25±0.16A | 16.31±0.58A | 23.29±0.29B  | 23.39±0.23B  | **            | ns | ns          |
| C20:0      | 0.31±0.04   | 0.39±0.04   | 0.50±0.06    | 0.49±0.02    | **            | ns | ns          |
| C22:0      | 0.23±0.06   | 0.27±0.02A  | 0.47±0.11    | 0.42±0.02B   | *             | ns | ns          |
| C16:1      | 1.95±0.17   | 1.75±0.06A  | 2.30±0.20    | 2.20±0.05B   | *             | ns | ns          |
| C18:1      | 38.40±0.84A | 37.21±0.36A | 25.24±0.65B  | 23.55±0.11B  | **            | *  | ns          |
| C20:1      | 1.28±0.11   | 1.30±0.05   | 1.36±0.03a   | 1.23±0.01b   | ns            | ns | ns          |
| C22:1      | 0.22±0.05   | 0.25±0.02A  | 0.45±0.08    | 0.38±0.02B   | **            | ns | ns          |
| C18:2n-6   | 2.98±0.09aA | 3.78±0.03b  | 1.57±0.19aB  | 3.01±0.16b   | **            | ** | ns          |
| C18:3n-3   | 0.17±0.02   | 0.20±0.03   | 0.13±0.02    | 0.22±0.02    | ns            | ns | ns          |
| C18:3n-6   | 0.27±0.04A  | 0.27±0.03A  | 0.11±0.02B   | 0.14±0.01B   | **            | ns | ns          |
| C20:2n-6   | 0.32±0.05   | 0.39±0.03A  | 0.27±0.01    | 0.28±0.01B   | *             | ns | ns          |
| C20:3n-6   | 0.69±0.04   | 0.66±0.05   | 0.63±0.03a   | 0.72±0.01b   | ns            | ns | ns          |
| C20:3n-3   | 0.07±0.01   | 0.09±0.01   | 0.10±0.02    | 0.11±0.01    | ns            | ns | ns          |
| C20:4n-6   | 1.09±0.02aA | 1.31±0.01bA | 2.51±0.08aB  | 2.97±0.05bB  | **            | ** | *           |
| C20:5n-3   | 0.21±0.01A  | 0.29±0.03A  | 1.05±0.07B   | 1.31±0.11B   | **            | *  | ns          |
| C22:3      | 0.07±0.02A  | 0.10±0.01A  | 0.17±0.03aB  | 0.40±0.05bB  | **            | ** | *           |
| C22:4n-6   | 0.19±0.06   | 0.25±0.02A  | 0.40±0.05    | 0.39±0.01B   | **            | ns | ns          |
| C22:5n-3   | 0.28±0.08   | 0.33±0.03A  | 0.71±0.18    | 0.65±0.04B   | **            | ns | ns          |
| C22:6n-3   | 1.85±0.04aA | 2.15±0.08bA | 4.07±0.03aB  | 4.55±0.10bB  | **            | ** | ns          |
| Σ SFA      | 49.90±0.72A | 49.67±0.44A | 58.95±0.38B  | 57.89±0.33B  | **            | ns | ns          |
| Σ MUFA     | 41.85±0.90A | 40.50±0.43A | 29.34±0.62aB | 27.35±0.08bB | **            | *  | ns          |
| Σ PUFA     | 8.17±0.37aA | 9.82±0.31bA | 11.71±0.41aB | 14.75±0.30bB | **            | ** | ns          |
| Σ n-3 PUFA | 2.58±0.16A  | 3.07±0.16A  | 6.06±0.21aB  | 6.84±0.18bB  | **            | ** | ns          |
| Σ n-6 PUFA | 5.53±0.20a  | 6.66±0.14b  | 5.48±0.30a   | 7.51±0.41b   | ns            | ** | ns          |

Notes: means with different lowercases in the same dietary lipid with different V<sub>E</sub> level are significantly different from each other; means with different largercases in the same dietary V<sub>E</sub> level with different lipid source are significantly different from each other (\*\*:  $P < 0.01$ ; \*:  $P < 0.05$ ; ns:  $P > 0.05$ ).
